# Supplementary material for: Oriented Polyaniline Nanowire Arrays Grown on Dendrimer (PAMAM) Functionalized Multiwalled Carbon Nanotubes as Supercapacitor Electrode Materials
Source: PubMed Central journal article supplement (PMC5908880; doi:10.1038/s41598-018-24265-7), 2018-04-19
Supplement: 41598_2018_24265_MOESM1_ESM.pdf [file 41598_2018_24265_MOESM1_ESM.pdf]

## **Supplementary Information**

### **Oriented Polyaniline Nanowire Arrays Grown on Dendrimer (PAMAM) Functionalized Multiwalled Carbon Nanotubes as Supercapacitor Electrode Materials**

Lin Jin<sup>a</sup>, Yu Jiang<sup>a</sup>, Mengjie Zhang<sup>a</sup>, Honglong Li<sup>a</sup>, Linghan Xiao<sup>\*a</sup>, Ming Li<sup>\*a</sup>, Yuhui  
Ao<sup>\*a</sup>

<sup>a</sup> College of Chemistry and Life Science, Jilin Province Key Laboratory of Carbon  
Fiber Development and Application, Changchun University of Technology,  
Changchun 130012, People's Republic of China.

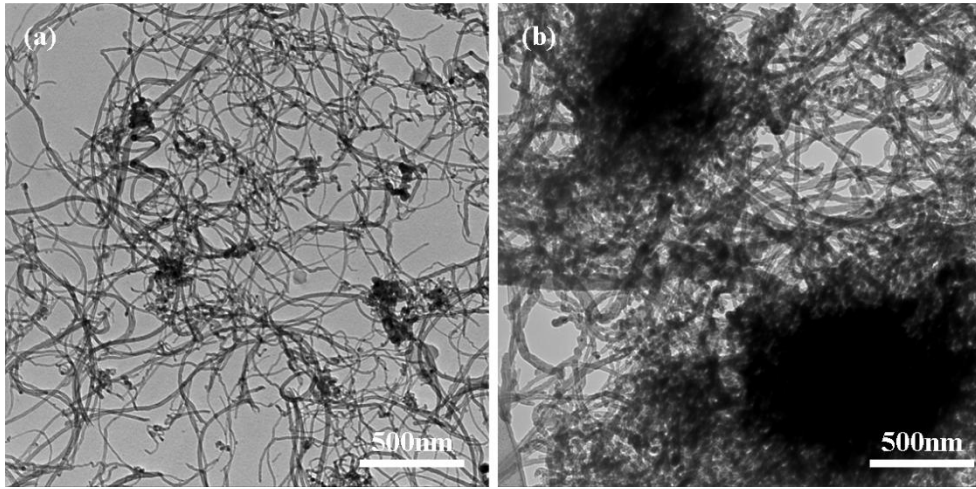

Figure S1. TEM micrographs of P-MWNT (a) and pristine MWNT (b).

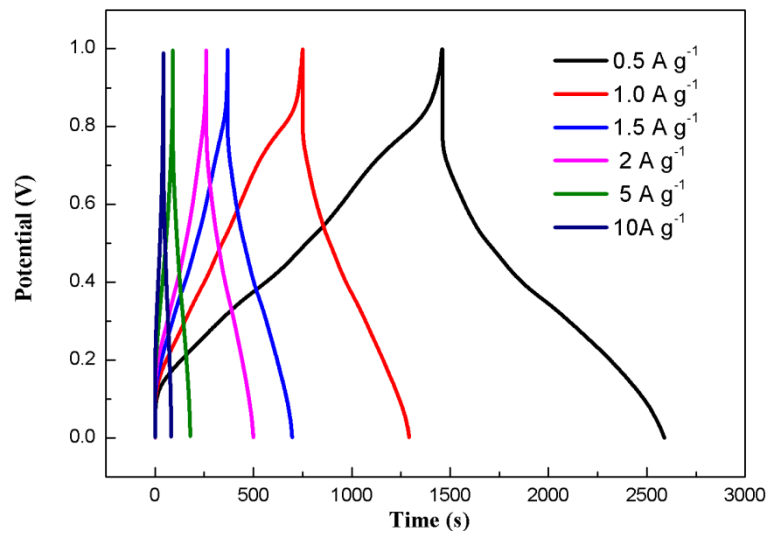

Figure S2. Charge-discharge curves with different rates of P-MWNT-PANI.

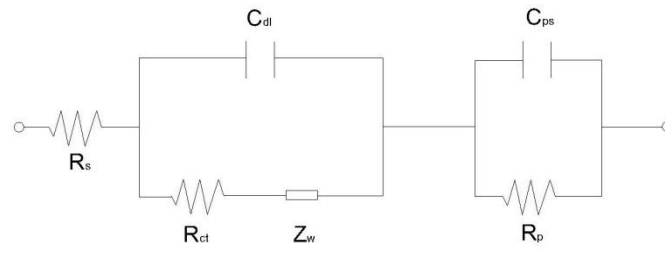

Figure S3. The equivalent electric circuit used in fitting the experimental data.
